# Supplementary material
Source: MDPI journal article supplement (https://www.mdpi.com/2079-9292/12/22/4580)
Supplement: s1 [file s1]

Archive with 3 entries (3 files):
- Supplementary File S1_ER_03.11.23.pdf
- Supplementary File S2_ER_17.11.23.pdf
- Supplementary File S3_ER_17.11.23.pdf
