# Supplementary material
Source: MDPI journal article supplement (https://www.mdpi.com/2079-9292/12/22/4580)
Supplement: s1 [file s1]

**Supplementary File S2.** Quality assessment of included studies.

| Type of study    | Study                      | Screening questions                     |                                                                    | Qualitative studies                                                           |                                                                                             |                                                         |                                                                           |                                                                                                    |
|------------------|----------------------------|-----------------------------------------|--------------------------------------------------------------------|-------------------------------------------------------------------------------|---------------------------------------------------------------------------------------------|---------------------------------------------------------|---------------------------------------------------------------------------|----------------------------------------------------------------------------------------------------|
|                  |                            | S1. Are there clear research questions? | S2. Do the collected data allow to address the research questions? | 1.1. Is the qualitative approach appropriate to answer the research question? | 1.2. Are the qualitative data collection methods adequate to address the research question? | 1.3. Are the findings adequately derived from the data? | 1.4. Is the interpretation of results sufficiently substantiated by data? | 1.5. Is there coherence between qualitative data sources, collection, analysis and interpretation? |
| 1. Quantitative  | Behrens et al. [116]       | Yes                                     | Yes                                                                |                                                                               |                                                                                             |                                                         |                                                                           |                                                                                                    |
| 2. Quantitative  | Porras-Garcia et al. [117] | Yes                                     | Yes                                                                |                                                                               |                                                                                             |                                                         |                                                                           |                                                                                                    |
| 3. Quantitative  | Porras-Garcia et al. [118] | Yes                                     | Yes                                                                |                                                                               |                                                                                             |                                                         |                                                                           |                                                                                                    |
| 4. Quantitative  | Keizer et al. [119]        | Yes                                     | Yes                                                                |                                                                               |                                                                                             |                                                         |                                                                           |                                                                                                    |
| 5. Quantitative  | Malighetti et al. [120]    | Yes                                     | Yes                                                                |                                                                               |                                                                                             |                                                         |                                                                           |                                                                                                    |
| 6. Quantitative  | Marco et al. [121]         | Yes                                     | Yes                                                                |                                                                               |                                                                                             |                                                         |                                                                           |                                                                                                    |
| 7. Quantitative  | Porras-Garcia et al. [122] | Yes                                     | Yes                                                                |                                                                               |                                                                                             |                                                         |                                                                           |                                                                                                    |
| 8. Quantitative  | Porras-Garcia et al. [123] | Yes                                     | Yes                                                                |                                                                               |                                                                                             |                                                         |                                                                           |                                                                                                    |
| 9. Quantitative  | Provenzano et al. [124]    | Yes                                     | Yes                                                                |                                                                               |                                                                                             |                                                         |                                                                           |                                                                                                    |
| 10. Quantitative | Serino et al. [125]        | Yes                                     | Yes                                                                |                                                                               |                                                                                             |                                                         |                                                                           |                                                                                                    |

| Type of study   | Study                      | 2. Quantitative randomized controlled trials   |                                             |                                       |                                                                  |                                                                | Non-randomized studies                                             |                                                                                              |                                       |                                                                    |                                                                                                    |
|-----------------|----------------------------|------------------------------------------------|---------------------------------------------|---------------------------------------|------------------------------------------------------------------|----------------------------------------------------------------|--------------------------------------------------------------------|----------------------------------------------------------------------------------------------|---------------------------------------|--------------------------------------------------------------------|----------------------------------------------------------------------------------------------------|
|                 |                            | 2.1. Is randomization appropriately performed? | 2.2. Are the groups comparable at baseline? | 2.3. Are there complete outcome data? | 2.4. Are outcome assessors blinded to the intervention provided? | 2.5. Did the participants adhere to the assigned intervention? | 3.1. Are the participants representative of the target population? | 3.2. Are measurements appropriate regarding both the outcome and intervention (or exposure)? | 3.3. Are there complete outcome data? | 3.4. Are the confounders accounted for in the design and analysis? | 3.5. During the study period, is the intervention administered (or exposure occurred) as intended? |
| 1. Quantitative | Behrens et al. [116]       |                                                |                                             |                                       |                                                                  |                                                                | Can't tell                                                         | Yes                                                                                          | Yes                                   | Yes                                                                | Yes                                                                                                |
| 2. Quantitative | Porras-Garcia et al. [117] |                                                |                                             |                                       |                                                                  |                                                                |                                                                    | Yes                                                                                          | Yes                                   | Yes                                                                | Yes                                                                                                |
| 3. Quantitative | Porras-Garcia et al. [118] | Yes                                            | Yes                                         | Yes                                   | Yes                                                              | Yes                                                            |                                                                    |                                                                                              |                                       |                                                                    |                                                                                                    |
| 4. Quantitative | Keizer et al. [119]        |                                                |                                             |                                       |                                                                  |                                                                | Can't tell                                                         | Yes                                                                                          | Yes                                   | Yes                                                                | Yes                                                                                                |
| 5. Quantitative | Malighetti et al. [120]    |                                                |                                             |                                       |                                                                  |                                                                | No                                                                 | Yes                                                                                          | Yes                                   | Yes                                                                | Yes                                                                                                |
| 6. Quantitative | Marco et al. [121]         | Yes                                            | Yes                                         | Yes                                   | Yes                                                              | Yes                                                            |                                                                    |                                                                                              |                                       |                                                                    |                                                                                                    |
| 7. Quantitative | Porras-Garcia et al. [122] | Yes                                            | Yes                                         | Yes                                   | Yes                                                              | Yes                                                            |                                                                    |                                                                                              |                                       |                                                                    |                                                                                                    |
| 8. Quantitative | Porras-Garcia et al. [123] |                                                |                                             |                                       |                                                                  |                                                                | the only participant was representative                            | Yes                                                                                          | Yes                                   | Yes                                                                | Yes                                                                                                |

[illegible]

|                  |                            |     |     |     |     |     |  |  |  |  |  |
|------------------|----------------------------|-----|-----|-----|-----|-----|--|--|--|--|--|
|                  | Garcia et al. [122]        |     |     |     |     |     |  |  |  |  |  |
| 8. Quantitative  | Porras-Garcia et al. [123] | Yes | Yes | Yes | Yes | Yes |  |  |  |  |  |
| 9. Quantitative  | Provenzano et al. [124]    | Yes | Yes | Yes | Yes | Yes |  |  |  |  |  |
| 10. Quantitative | Serino et al. [125]        | Yes | No  | Yes | Yes | Yes |  |  |  |  |  |
